# Supplementary material for: Immunotherapeutic potential of collagen V oral administration in mBSA/CFA-induced arthritis
Source: PubMed Central journal article supplement (PMC11460680; doi:10.1371/journal.pone.0311263), 2024-10-08
Supplement: pone.0311263.s004.pdf [file pone.0311263.s004.pdf]

**Krenn's histopathological score for evaluation of the degree of synovitis of IA and IA-Col V groups**

| Score |      |            |            |
|-------|------|------------|------------|
| IA R  | IA L | IA-Col V R | IA-Col V L |
| 9     | 1    | 1          | 0          |
| 5     | 0    | 4          | 0          |
| 9     | 1    | 2          | 1          |
| 5     | 0    | 3          | 1          |
| 5     | 0    | 2          | 0          |
| 5     | 0    | 3          | 0          |
| 9     | 2    | 0          | 2          |
| 6     | 0    | 2          | 0          |
| 5     | 0    | 3          | 2          |
| 7     |      | 2          |            |

**Quantification of [18F]FDG uptake presented as the standardized uptake value (SUV) of the right (R) and left (L) knees of IA and IA-Col V groups**

| PET/CT     |      |      |      |      |      |      |      |      |      |      |
|------------|------|------|------|------|------|------|------|------|------|------|
| IA R       |      |      |      |      |      |      |      |      |      |      |
| Baseline   | 0.57 | 0.53 | 0.47 | 0.64 | 0.58 | 0.51 | 0.41 |      |      |      |
| 14 days    | 0.98 | 0.77 | 0.89 | 0.58 | 0.7  | 0.93 | 0.6  |      |      |      |
| 30 days    | 0.78 | 0.65 | 0.82 | 0.67 | 0.61 | 0.81 | 0.53 |      |      |      |
| IA L       |      |      |      |      |      |      |      |      |      |      |
| Baseline   | 0.51 | 0.41 | 0.61 | 0.53 | 0.61 | 0.5  | 0.42 |      |      |      |
| 14 days    | 0.61 | 0.51 | 0.47 | 0.31 | 0.41 | 0.4  | 0.31 |      |      |      |
| 30 days    | 0.43 | 0.5  | 0.48 | 0.59 | 0.33 | 0.33 | 0.38 |      |      |      |
| IA-Col V R |      |      |      |      |      |      |      |      |      |      |
| Baseline   | 0.59 | 0.55 | 0.45 | 0.54 | 0.7  | 0.58 | 0.42 | 0.55 | 0.37 | 0.29 |
| 14 days    | 0.9  | 0.82 | 0.8  | 0.95 | 1.09 | 0.99 | 1.09 | 0.42 | 0.54 | 0.46 |
| 30 days    | 1.04 | 0.81 | 0.48 | 0.79 | 0.89 | 1.09 | 1.05 | 0.43 | 0.61 | 0.49 |
| IA-Col V L |      |      |      |      |      |      |      |      |      |      |
| Baseline   | 0.44 | 0.51 | 0.39 | 0.44 | 0.58 | 0.6  | 0.49 | 0.52 | 0.4  | 0.29 |
| 14 days    | 0.62 | 0.64 | 0.61 | 0.64 | 0.72 | 0.68 | 0.74 | 0.41 | 0.35 | 0.35 |
| 30 days    | 0.78 | 0.58 | 0.36 | 0.72 | 0.71 | 0.66 | 0.77 | 0.43 | 0.44 | 0.45 |

**Quantification of CD3+, CD4+, CD8+, CD20+ and CD68+ cell expression in synovial tissue of IA and IA-Col V groups**

| CD3+  |      |            |            |
|-------|------|------------|------------|
| IA R  | IA L | IA-Col V R | IA-Col V L |
| 62.08 | 6.17 | 46.68      | 0          |
| 83.99 | 0    | 42.43      | 4.17       |
| 52.83 | 7.35 | 32.49      | 6.37       |
| 63.3  | 0    | 51.97      | 3.61       |
| 80.03 | 0    | 50.61      | 2.68       |
| 60.82 | 0    | 37.19      | 8.25       |
| 41.81 |      | 59.41      | 1          |
| 53.82 |      |            | 5.13       |
|       |      |            | 2.11       |
|       |      |            | 3.36       |
|       |      |            | 3.53       |

| CD4+  |      |            |            |
|-------|------|------------|------------|
| IA R  | IA L | IA-Col V R | IA-Col V L |
| 41.84 | 2.86 | 9.85       | 0          |
| 61.71 | 9.76 | 9.85       | 5.6        |
| 53.05 | 0.91 | 31         | 6.99       |
| 53.17 | 6.52 | 30.85      | 1.75       |
| 23.21 | 9.02 | 27.35      | 8.43       |
| 21.42 | 7.75 | 28.07      | 0.77       |
| 24.76 | 0.57 | 29.01      | 6.47       |
|       | 1.39 | 31.48      | 3.68       |
|       |      | 9.65       | 4.17       |
|       |      | 23.1       | 2.08       |

| CD8+  |       |            |            |
|-------|-------|------------|------------|
| IA R  | IA L  | IA-Col V R | IA-Col V L |
| 44.48 | 0     | 42.55      | 1.43       |
| 68.73 | 8.1   | 49         | 4.36       |
| 74.71 | 5.41  | 45.93      | 0          |
| 40.75 | 2.81  | 23.85      | 5.64       |
| 51.61 | 15.97 | 51.86      | 0          |
| 46.97 | 10.04 | 50.21      | 3.72       |
| 44.85 | 10.25 | 52.61      | 6.92       |
|       | 0     |            | 0          |
|       |       |            | 0          |

| CD20+ |      |            |            |
|-------|------|------------|------------|
| IA R  | IA L | IA-Col V R | IA-Col V L |
| 46.83 | 1.11 | 28.62      | 5.36       |
| 38.77 | 2.87 | 11.02      | 8.37       |
| 82.47 | 2.98 | 45.16      | 6          |
| 84.78 | 4.69 | 44.65      | 0          |
| 39.88 | 2    | 17.03      | 8.47       |
| 31.46 | 4.36 | 46.01      | 5.66       |
| 51.03 | 3.94 | 34.86      | 7.17       |
|       | 0    | 25.09      | 3.61       |

| CD68+ |      |            |            |
|-------|------|------------|------------|
| IA R  | IA L | IA-Col V R | IA-Col V L |
| 7.05  | 4.4  | 8.6        | 0          |
| 13.77 | 0    | 3.63       | 2.22       |
| 8.73  | 0    | 9.39       | 0          |
| 8.8   | 0    | 6.76       | 0          |
| 7.96  | 0    | 8.71       | 0          |
| 19.2  | 0    | 2.97       | 2          |
|       |      | 4.92       |            |
|       |      | 4.88       |            |
|       |      | 3.12       |            |
|       |      | 4.93       |            |

**Anti-collagen II and V antibodies frequency in the sera of the control, IA and IA-Col V groups**

| Anti-collagen II antibodies |       |          |
|-----------------------------|-------|----------|
| Control                     | IA    | IA-Col V |
| 0.027                       | 0.406 | 0.494    |
| 0.014                       | 0.677 | 0.468    |
| 0.031                       | 0.218 | 0.591    |
| 0.042                       | 0.168 | 0.457    |
| 0.046                       | 0.153 | 0.384    |
| 0.029                       | 0.215 | 0.342    |
| 0.019                       | 0.108 | 0.165    |
| 0.018                       | 0.075 | 0.089    |
| 0.03                        | 0.175 | 0.153    |
| 0.033                       | 0.395 | 0.143    |

| Anti-collagen V antibodies |       |          |
|----------------------------|-------|----------|
| Control                    | IA    | IA-Col V |
| 0.041                      | 0.142 | 0.166    |
| 0.043                      | 0.403 | 0.251    |
| 0.023                      | 0.213 | 0.263    |
| 0.023                      | 0.189 | 0.273    |
| 0.043                      | 0.201 | 0.282    |
| 0.029                      | 0.378 | 0.157    |
| 0.036                      | 0.23  | 0.249    |
| 0.031                      | 0.255 | 0.32     |
| 0.051                      | 0.189 | 0.302    |
| 0.04                       | 0.14  | 0.209    |

**Quantification of IL-10+ and FoxP3+ cell expression of IA and IA-Col V groups**

| IL-10+ |       |            |            |
|--------|-------|------------|------------|
| IA R   | IA L  | IA-Col V R | IA-Col V L |
| 39.69  | 1.43  | 63.95      | 2.59       |
| 30.77  | 7.83  | 67.32      | 0.91       |
| 31.14  | 3.99  | 58.03      | 7.01       |
| 65.08  | 4.43  | 65.31      | 0.91       |
| 62.93  | 10.28 | 51.87      | 0          |
| 44.51  | 1.5   | 57.61      | 1.94       |
| 12.88  | 3.3   | 48.47      | 6.96       |
| 42.93  | 1.38  | 59.32      | 0          |
|        |       | 66.53      | 0.83       |
|        |       | 55.09      | 0          |

| FoxP3+ |      |            |            |
|--------|------|------------|------------|
| IA R   | IA L | IA-Col V R | IA-Col V L |
| 15.34  | 0    | 15.32      | 3.43       |
| 17.49  | 0    | 29.46      | 0          |
| 4.97   | 2.78 | 35.93      | 0          |
| 7.78   | 2.87 | 20.01      | 1          |
| 8.91   | 0    | 20.82      | 3.65       |
| 19.14  | 2.08 | 22.16      | 0.83       |
| 9.35   | 3.23 | 23.48      | 4.84       |
|        | 6.19 | 19.38      | 5.85       |
|        |      |            | 5.5        |
|        |      |            | 5.6        |

**Quantification of types I, III and V collagen expression of IA and IA-Col V groups**

| Collagen I |       |            |            |
|------------|-------|------------|------------|
| IA R       | IA L  | IA-Col V R | IA-Col V L |
| 7.67       | 15.97 | 15.61      | 8.41       |
| 11.65      | 7.18  | 21         | 7.21       |
| 12.96      | 16.17 | 16.98      | 8.59       |
| 17.46      | 14.19 | 18.67      | 10.56      |
| 12.53      | 8.96  | 16.01      | 16.37      |
| 10.15      | 15.38 | 17.46      | 11.81      |
| 8.93       | 6.02  | 23.87      | 14.43      |
| 12.15      | 9.92  | 15.3       | 8.88       |
| 6.84       | 7     | 14.45      | 15.26      |
|            |       | 11.95      | 6.9        |

| Collagen III |      |            |            |
|--------------|------|------------|------------|
| IA R         | IA L | IA-Col V R | IA-Col V L |
| 4.57         | 6.32 | 4.24       | 5          |
| 2.13         | 3.45 | 6.75       | 5.44       |
| 2.96         | 4.28 | 5.56       | 4.2        |
| 4.09         | 4.93 | 4.28       | 3.81       |
| 5.54         | 4.56 | 3.93       | 4.71       |
| 1.24         | 1.85 | 2.17       | 2.58       |
| 1.13         | 1.24 | 1.99       | 2.2        |
| 1.22         | 1.21 | 1.93       | 1.66       |
|              | 1.32 | 3.26       | 2.37       |
|              | 2.19 | 1.22       | 3.37       |

| Collagen V |      |            |            |
|------------|------|------------|------------|
| IA R       | IA L | IA-Col V R | IA-Col V L |
| 19.22      | 2.45 | 2.35       | 0.65       |
| 5.18       | 3.73 | 1.88       | 1.24       |
| 12.7       | 4.27 | 5.02       | 1.43       |
| 16.76      | 6.61 | 2.95       | 1.44       |
| 8.47       | 5.96 | 2.24       | 2.39       |
| 17.33      | 3.64 | 1.71       | 4.87       |
| 5.45       | 6.69 | 5.03       | 0.67       |
|            | 4.93 | 2.1        | 0.62       |
|            | 3.37 | 2.62       | 0.46       |
|            |      | 2.89       | 5.59       |
